# Supplementary material for: Network Systems Pharmacology-Based Mechanism Study on the Beneficial Effects of Vitamin D against Psychosis in Alzheimer’s Disease
Source: PubMed Central journal article supplement (PMC7145835; doi:10.1038/s41598-020-63021-8), 2020-04-09
Supplement: 41598_2020_63021_MOESM1_ESM.pdf [file 41598_2020_63021_MOESM1_ESM.pdf]

# Supplementary Materials

## Network Systems Pharmacology-Based Mechanism Study on the Beneficial Effects of Vitamin D against Psychosis in Alzheimer's Disease

**Peihao Fan<sup>1</sup>, MS Xiguang Qi<sup>1</sup>, BS Robert A. Sweet<sup>2, 3, 4\*</sup>, MD Lirong Wang<sup>1\*</sup>, PhD**

<sup>1</sup>Department of Pharmaceutical Sciences, Computational Chemical Genomics Screening, University of Pittsburgh School of Pharmacy, Pittsburgh; <sup>2</sup>Department of Neurology, University of Pittsburgh School of Medicine, Pittsburgh; <sup>3</sup>Department of Psychiatry, University of Pittsburgh School of Medicine, Pittsburgh; <sup>4</sup>VISN 4 Mental Illness Research, Education and Clinical Center, VA Pittsburgh Healthcare System, Pittsburgh.

\*Corresponding Authors:

**Robert A Sweet, MD**

UPMC Endowed Professor in Psychiatric Neuroscience

Professor of Neurology and Clinical and Translational Science

3811 O'Hara Street

Pittsburgh, PA 15213

Email: [sweetra@upmc.edu](mailto:sweetra@upmc.edu)

Phone: 412-624-0064

**Lirong Wang, PhD**

Assistant Professor

Computational Chemical Genomics Screening Center

Department of Pharmaceutical Sciences/School of Pharmacy

University of Pittsburgh

528 Salk Hall, 3501 Terrace Street

Pittsburgh, PA 15213

Email: [liw30@pitt.edu](mailto:liw30@pitt.edu)

Phone: 412-624-8118

### **Inclusion criteria for genes**

Due to the variety of information sources, genes were carefully selected from different types of data including RNA and miRNA expression, SNPs identified through GWAS, copy number variations (CNVs), and mutation data. 1) reported in a primary GWAS analysis, defined as array-based genotyping and analysis of 100,000+ pre-QC SNPs selected to tag variation across the genome and without regard to gene content; 2) SNP-trait p-value  $< 1.0 \times 10^{-5}$  in the overall population. The threshold of  $1.0 \times 10^{-5}$  was chosen rather than the stricter one for genome-wide association of  $5.0 \times 10^{-8}$ <sup>1,2</sup> to include more targets potentially related to AD and psychosis to generate a more complete structure of networks<sup>3,4</sup>.

## Alzheimer's disease-related genes

|          |          |         |          |                     |           |         |
|----------|----------|---------|----------|---------------------|-----------|---------|
| HLADRB1  | EIF4EBP1 | A2M     | LRP1     | ABCA1               | ABCA2     | ABCA7   |
| ABCC2    | ABCG1    | ACAD8   | ACE      | ACHE                | CHRM2     | ACTA2   |
| ACTL8    | ADAMTS1  | ADAM10  | ADAM12   | ADAR                | AGBL4     | AGTR1   |
| AGTR2    | AKT1     | ALDH2   | ALOX12   | ALOX15              | ALOX5     | AMBRA1  |
| RUNX1    | ANKH     | ANKRD2  | ANKRD6   | ANO3                | APEX1     | APH1A   |
| APH1B    | APLP2    | APOA1   | APOC1    | APOC1P1             | APOC2     | APOC4   |
| APOD     | APOE     | LRP8    | APOF     | LPA                 | APOM      | APP     |
| NAE1     | APPBP2   | PRNP    | ARHGAP30 | ARPP19              | SRRT      | ARSB    |
| ASAH1    | ATAD2    | ATF2    | ATF4     | ATP10B              | ATP13A5   | ATP8A1  |
| ATXN7L1  | ADCY2    | ACAN    | ADAMTS4  | AGRN                | SERPINA1  | ACTR1A  |
| SNCA     | IAPP     | AR      | ANK3     | ANXA13              | TNFSF10   | AQP1    |
| ARSA     | AXIN1    | B4GALT3 | B9D2     | BACE1               | BACE2     | PBRM1   |
| SMARCD3  | ADGRB3   | BAP1    | DDX39B   | BCAM                | BCAS3     | BCR     |
| BCYRN1   | BCHE     | BDNF    | BDNF-AS  | BICC1               | BIN1      | PRUNE2  |
| SLC25A14 | BMP5     | ASIC2   | BRD3     | BCL3                | BCL2L2    | BECN1   |
| ADRB1    | CTNNB1   | BLMH    | BRCA1    | C10orf55            | C14orf177 | CLUHP3  |
| MTHFD1L  | STUM     | C1R     | MROH8    | PP2D1               | C5AR1     | C6orf48 |
| CACNA1C  | CACNA2D4 | CALB1   | CAMK1D   | CARD8               | NEDD9     | CBLC    |
| CBS      | CCDC83   | CACNG4  | CCL2     | CCR3                | CCR5      | CD14    |
| CR2      | CD2AP    | CD33    | CD40     | CD40LG              | CD8A      | CD86    |
| CDK1     | CDK5     | CDK5R1  | CDK5R2   | CDON                | CEACAM16  | CEP164  |
| CETP     | CFTR     | CHD6    | STUB1    | CHAT                | CLCN6     | CLEC16A |
| CLIC5    | CLPTM1   | CNGB1   | CNR2     | CNTN5               | COG1      | VPS13B  |
| COL18A1  | COMT     | COPA    | COX6C    | PTGS1               | PTGS2     | COX10   |
| CR1      | CR1L     | CREB1   | CRHR1    | LINC02210-<br>CRHR1 | CRP       | CSF1    |
| CSTF2T   | CTGF     | CUX2    | TET1     | CYP17A1             | CYP19A1   | CYP1A1  |
| CYP27C1  | CYP46A1  | CAMK1   | CAMK2A   | CAMK2G              | RCAN1     | S100A9  |
| S100A12  | CAPN1    | CAST    | CSNK1D   | CSNK2A2             | CASP2     | CASP3   |
| CASP4    | CASP8    | CASP9   | CNTNAP2  | CTNNA3              | CTSB      | CTSD    |
| CTSS     | ADAP1    | CP      | CH25H    | CHGA                | CLU       | F5      |
| F8       | F13A1    | COL19A1 | CRH      | CSMD1               | CUBN      | CCNC    |
| CCND1    | CST3     | DAPK1   | DAXX     | ASAP2               | DEDD      | DEFB122 |
| GLUD1    | DIO1     | DIO2    | DIP2C    | DIRAS2              | DISC1     | PARK7   |
| DKK1     | DLD      | DLGAP1  | POLB     | DNAJC12             | DNMBP     | DONSON  |
| KCNIP3   | TSC22D3  | DVL1    | DYNC1I1  | DYRK1A              | CTNND2    | DRD1    |
| DRD3     | DRD4     | DBN1    | DNM2     | E2F1                | EBF3      | ECE1    |
| EDEM2    | EFCAB7   | EGR1    | ELOVL6   | ENO1                | ENO2      | ENTPD7  |
| ERAP1    | ERG      | KCNH6   | MAPK3    | MAPK1               | ESR1      | ESR2    |
| CELF2    | EYA4     | EYS     | POMK     | EPHA1               | EPHA5     | EFNA5   |

|           |            |            |          |              |           |           |
|-----------|------------|------------|----------|--------------|-----------|-----------|
| EPOR      | ERBB4      | FAAH       | FAF1     | OTULIN       | CALHM1    | MINDY1    |
| FAM89B    | UBD        | FDPS       | FGF1     | FHIT         | ENOX1     | INO80D    |
| BASP1-AS1 | C5orf64    | FMNL2      | FMO2     | FSTL5        | FTO       | FNTA      |
| FASLG     | FAS        | FCER1G     | FCGR2B   | APBB1        | APBB2     | APBB3     |
| AHSG      | FLOT1      | FYN        | GNAO1    | GNB3         | GAPDH     | GAPDHS    |
| GCNT1     | GAB2       | GALNT17    | GBP2     | GABBR1       | GCFC2     | PLEKHG5   |
| GFAP      | GGA1       | SLC1A3     | GBA      | GLUL         | GLS2      | GOLM1     |
| RXFP3     | ADGRG1     | GRAMD1B    | GRK2     | GSK3A        | GSK3B     | GSTA4     |
| GSTO1     | GSTO2      | GSTP1      | GSTT1    | GAL          | GALP      | SNCG      |
| GSN       | GHRL       | GRIA1      | GRIA4    | GP6          | GPC1      | FABP3     |
| HSD17B10  | HECW1      | HHEX       | HLA-A    | HFE          | HLX-AS1   | HLX       |
| HMGCR     | HMGB1      | HMGCS2     | ARHGAP45 | HOOK3        | HSD11B1   | HSPB8     |
| HSPA1B    | HSPA2      | CWC15      | HTR1A    | HTR2A        | HTR2C     | HTR6      |
| ZWINT     | HMOX1      | ELAVL4     | RNR2     | HTT          | IGFBP2    | IGFBP3    |
| IGFBP6    | ICAM1      | ICAM4      | IDE      | IFNG         | IGF1      | IGF1R     |
| IGF2      | IGF2R      | IL1A       | IL1B     | IL10         | IL18      | IL2       |
| IL33      | IL6        | IL1RN      | IL6R     | CXCR2        | IMMP2L    | CXCL10    |
| ITPR1     | IQCK       | IREB2      | TCF4     | ITGAM        | ITM2B     | IVD       |
| INS       | INSR       | IQCE       | JAK2     | F11R         | MAPK8IP1  | KLHDC9    |
| KCNAB2    | KCNH7      | KCNMA1-AS1 | KCNQ3    | CKB          | WASHC4    | KANSL1    |
| FAM214A   | FAM120B    | WWC1       | KIF13B   | KIF26B       | KLC1      | KIF11     |
| KLK10     | KLK6       | KLK7       | SLC4A1AP | KCNC4        | L3MBTL4   | LAMA1     |
| LAMC1     | LDLR       | LHCGR      | LHFPL6   | LINC00466    | LINC00475 | LINC00836 |
| LINC01122 | LIPA       | STK11      | LMOD3    | LOC101929570 | LOC145845 | RBM15-AS1 |
| EMBP1     | LPL        | LRAT       | LRP6     | PPP1R37      | LRRK2     | LRRN2     |
| LRRTM3    | LRRTM4     | LRTM2      | LUZP2    | LMNA         | LCK       | MAGI1     |
| MAGI2     | MAL2       | MAOA       | MAOB     | MAPT-AS1     | MAPT-IT1  | MARCH10   |
| MARK1     | MAT1A      | MBOAT1     | SLC16A7  | ABCB1        | MEF2A     | MEIS1     |
| MAP2K1    | MAP2K2     | MEX3A      | MGAT5B   | MGST1        | MIF       | CCL3      |
| CCL4      | CCL4L1     | MMP12      | MMP8     | MPP7         | MPZL1     | LRPAP1    |
| MRE11     | MROH7-TTC4 | MS4A4A     | MSI1     | MSR1         | STK24     | MTHFR     |
| ND1       | MTR        | STXBP1     | MYH13    | MYH7B        | KCNMA1    | MTNR1A    |
| MS4A6A    | MYOCD      | MYOF       | MYO10    | NACA         | QPR1      | NALCN     |
| ART3      | NAT1       | NAT2       | NAV2     | NCAM1        | SLC8A1    | NME1      |
| NME1-NME2 | NME2       | NDRG2      | NDUFS2   | NEFH         | NEFL      | NGFR      |
| TMEM147   | NINJ2      | NIPBL      | NKAIN2   | NKAPL        | NOTCH1    | NOTCH4    |
| NPAS2     | NPC2       | NPFFR2     | NPY      | NQO1         | GRIN1     | GRIN2A    |
| GRIN2B    | SLC11A1    | SLC11A2    | NQO2     | ITGB3BP      | NTF3      | NUMB      |

|          |          |          |          |             |             |          |
|----------|----------|----------|----------|-------------|-------------|----------|
| NECTIN2  | NECTIN4  | MME      | NRG1     | NCAN        | NCSTN       | NIT1     |
| NKPD1    | NXN      | DLST     | OGG1     | OLIG2       | OLR1        | OPA1     |
| OSGEP    | OTUD7A   | POU2F1   | SELP     | P2RY2       | PADI2       | SERPINE1 |
| PARP1    | PAXIP1   | PCDH11X  | PCGF5    | PCMTD1      | PCSK9       | PDE4B    |
| PDE9A    | PDZD7    | MPO      | PFDN2    | PGBD1       | PTGES2      | PTGDS    |
| PICALM   | PITRM1   | PRKACA   | PRKCA    | EIF2AK2     | PLA1A       | PLA2G2A  |
| PLAC4    | PLAT     | PLAU     | PLCE1    | PLXDC2      | PNMT        | POLN     |
| POMC     | POMT1    | PON1     | PON2     | PON3        | POTEA       | PPARD    |
| PPARG    | PCK1     | PPID     | PPOX     | PPP1R11     | PPP1R1C     | PPP1R3B  |
| PPP2R2B  | PRDX1    | PRDX2    | PRDX3    | APBB1IP     | PRKAR2A     | PRKAR2B  |
| PRND     | PRIMA1   | DLG4     | PSMB9    | PSMC4       | PTEN        | HACD1    |
| PTPRA    | PURA     | GART     | PVR      | ALDH18A1    | PAWR        | PCNX1    |
| PSENE1   | HSPG2    | PIN1     | PLG      | PSEN1       | PSEN2       | PCSK1N   |
| PDYN     | GRN      | PREP     | PRKG1    | PTK2B       | RSPO2       | RACK1    |
| RAD51B   | AGER     | GAPVD1   | RASSF4   | RDH13       | RGS4        | RPN2     |
| ROR1     | PLPPR1   | RTN4R    | RAB6A    | RELB        | RTN4        | S100B    |
| SAMSN1   | SAR1A    | ZFYVE9   | SBSN     | SCARA3      | SCN2A       | SERPINA3 |
| SERPINF2 | SLC6A4   | SREK1IP1 | SHISA9   | ST6GAL1     | SLC18A3     | SLC1A2   |
| SLC1A7   | SLC4A2   | SLC5A12  | SLC6A17  | SMAD3       | NCOR2       | SNAP25   |
| SNCA-AS1 | SNORD52  | SNX10    | SNX3     | SOAT1       | SOD1        | SOD2     |
| SORCS2   | SORL1    | SOS2     | SP1      | SGPL1       | SCARB1      | SIGMAR1  |
| ZSCAN26  | SSSCA1   | SUPV3L1  | SVIL     | SYP         | STH         | SEC24C   |
| CHGB     | SEMA3A   | SEPT1    | SEPT3    | SEPT7       | SQSTM1      | SIRT1    |
| SST      | GH1      | SORCS1   | SORCS3   | STMN1       | STXBP5L     | SYN1     |
| SYNPR    | SYT1     | STX8     | ZNF365   | TRIOBP      | TARDBP      | TAS2R60  |
| TBP      | TCF7L2   | TDRD10   | TEAD1    | TEP1        | TFAM        | TFCP2    |
| TFEB     | TGFB1    | TEK      | TIMP1    | TIMP2       | TIMP3       | TLK1     |
| TLR4     | TLR9     | TM2D1    | TMEM132D | TMEM147-AS1 | TMEM177     | TMED10   |
| TNFRSF1A | TNFRSF1B | TNF      | LTA      | TNK1        | TOMM40      | TPH1     |
| TPPP     | THRA     | TREM2    | TRIM15   | TRPC4AP     | TSNAX-DISC1 | TSPAN18  |
| TSTD1    | TTC27    | TUSC3    | TXNRD2   | MAPT        | TSPAN2      | THOP1    |
| TIAM1    | KAT5     | TMEM132C | TMTC1    | TCN1        | TCN2        | TF       |
| TTR      | NTRK1    | NTRK2    | NTRK3    | TTC4        | TSC2        | U2AF1L4  |
| UBB      | UBE2D1   | UBE2Q1   | UBXN4    | UCHL1       | UFC1        | UGCG     |
| UMAD1    | UNC13C   | USF1     | USP21    | USP35       | UXS1        | UBQLN1   |
| UFSP1    | MPP6     | VDR      | VEGFA    | ZNF197      | VSNL1       | HPCAL1   |
| MAVS     | VLDLR    | WDFY4    | WT1      | WEE1        | APBA1       | APBA2    |
| XRCC1    | XYLT1    | TRAK2    | ZBP1     | ZFYVE19     | ZNF155      | ZNF224   |
| ZNF225   | ZKSCAN4  | ZNF320   | ZSCAN31  | ZDHHC7      | ZNF720      | ZNF804A  |
| ZC3H3    | SLC30A1  | SLC30A4  | SLC30A6  | ZYX         | ABL1        | RAF1     |

|                          |                    |                     |                       |                      |                       |                        |
|--------------------------|--------------------|---------------------|-----------------------|----------------------|-----------------------|------------------------|
| RAPGEF4                  | EEF2               | EEF2K               | EIF2S1                | EIF4E                | NOS3                  | MIR4713                |
| MIR4761                  | MIR6843            | MIR6886             | MIR7846               | NOS2                 | MTOR                  | TRNQ                   |
| CHRNA2                   | CHRNA3             | CHRNA4              | CHRNA6                | CHRFAM7A             | CHRNA7                | CHRNB2                 |
| CHRNB4                   | NOS1               | RELN                | CDKN1B                | TP53                 | RPS6KB1               | TP73                   |
| ABCC13                   | AD10               | AD11                | AD12                  | AD13                 | AD14                  | AD15                   |
| AD16                     | AD5                | AD6                 | AD7                   | AD8                  | AD9                   | ADORA2A                |
| AGBL4-IT1                | ALB                | AMIGO2              | APCS                  | APLP1                | APOC4-<br>APOC2       | AQP4                   |
| ARMCX5-<br>GPRASP2       | ATP5F1A            | AZIN1-AS1           | BACH1                 | BHLHB9               | CASP1                 | CASP6                  |
| CASP7                    | CCL11              | CCL4L2              | CCL5                  | CCL7                 | CD36                  | CFAP410                |
| CHAF1B                   | CNR1               | COL18A1-<br>AS1     | CRYAB                 | CXCR3                | CYP2D7                | CYP7B1                 |
| DAGLA                    | EPHA1-AS1          | ERBB2               | ERBB3                 | GCG                  | GHRLOS                | GNAS                   |
| GPR55                    | GRIA2              | GRIA3               | HCRT                  | HNRNPA2B<br>1        | HP                    | IL12A                  |
| IL12B                    | KALRN              | KLK8                | LINC00211             | LINC00972            | LINC01081             | LINC01266              |
| LINC01492                | LINC01501          | LINC02254           | LINC02516             | LOC100130<br>587     | LOC100287<br>329      | LOC100379<br>224       |
| LOC100996<br>288         | LOC101927<br>502   | LOC101928<br>418    | LOC101928<br>651      | LOC101928<br>961     | LOC102724<br>297      | LOC414300              |
| LOC541472                | LOC643387          | LOC646506           | LRRC15                | MELTF                | MEOX2                 | MGLL                   |
| MMP2                     | MMP9               | MS                  | MS4A4E                | MUC22                | NAPEPLD               | OAT                    |
| P4HA3-AS1                | PAK1               | PDE8B               | PLUT                  | PRDX6                | PRKXP1                | RABGAP1L               |
| RNF146                   | SERPINF1           | SLC18A2             | SLC6A3                | SNCB                 | SSSCA1-AS1            | SYNPR-AS1              |
| TNFAIP1                  | TRPV1              | ANKRD22             | LINC00624             | RAD23BP2 -<br>SEMA3A | MECOM                 | MCPH1-AS1              |
| AKR7A3                   | IRAK1BP1           | SCAPER              | CEP63                 | SEC24B-AS1           | TENM4                 | TMCO4                  |
| NACAP6 -<br>LINC02150    | DYSF -<br>RPS20P10 | DLC1                | TMEM94                | PLCL1                | GPR180                | LINC00626 -<br>SUMO1P2 |
| BAALC-AS1,<br>BAALC      | CCZ1B -<br>OR7E39P | PCSK6               | RF00438 -<br>R3HDM2P2 | CFAP74               | CCDC112 -<br>CTNNA1P1 | CTNND2 -<br>RNU6-679P  |
| FAM240B                  | SLMAP              | AOX1                | UNC93B4               | CDH1                 | IQGAP2                | RASSF8                 |
| CEP295NL,<br>TIMP2       | FAM19A5            | KLHL36 -<br>USP10   | PIFO                  | IGSF23               | SELENOO               | CDCA7L -<br>RAPGEF5    |
| BNIP3P13 -<br>ZNF90      | SYNGAP1            | SESTD1              | TAS2R5                | CSNK2A1 -<br>TCF15   | C9orf152 -<br>TXN     | FAT3                   |
| RDX                      | ABCA8              | STEAP3 -<br>C2orf76 | NEK10                 | ERO1A -<br>PSMC6     | RNU7-188P<br>- SEM1   | SEC24B                 |
| GTF2H3                   | PTPRS -<br>ZNR4    | RASSF5              | COL25A1               | HMCN1                | NAALADL2              | RN7SKP120<br>- TUSC1   |
| RNA5SP169<br>- LINC02273 | KSR2               | MDGA2 -<br>MIR548Y  | OSER1-DT -<br>GDAP1L1 | JPH3                 | AQP4-AS1              | DNAH6                  |

|                       |                       |                             |                               |                          |                          |                              |
|-----------------------|-----------------------|-----------------------------|-------------------------------|--------------------------|--------------------------|------------------------------|
| HDAC9                 | SHANK2                | UGT1A10,<br>UGT1A8          | TBXAS1                        | KIFC3 -<br>CNGB1         | LINC02103 -<br>RNU6-909P | TSNAX-<br>DISC1,<br>DISC1    |
| LINC01725             | PAX2                  | PROX1-AS1                   | RN7SKP168<br>- ZFYVE9P2       | ATP8A2P3,<br>RNF6        | EDAR -<br>RF00017        | EPC2 -<br>RNU2-9P            |
|                       | APOC1 -<br>APOC1P1    | MTCYBP27 -<br>RNU6-976P     | SIGLEC22P -<br>CD33           | BIN1 -<br>NIFKP9         | MRPL58 -<br>RNU6-362P    | FBXL7                        |
| CACNA2D3              | ADAMTS9-<br>AS2       | DCHS2                       | PUM3                          | HRK                      | SLC28A1                  | MLN -<br>LINC01016           |
| DYNLL1P4 -<br>RBM19   | PRRC2C                | FMN2                        | CTNNA2                        | LIMS2                    | MOBP                     | STK32B                       |
| AFF1                  | ANKRD55               | PGAM5P1                     | CAMK4                         | DMXL1                    | MEGF10                   | LINC01184                    |
| SAP30L                | PLEKHG1               | BZW2                        | CYCS                          | ELMO1                    | EXOC4                    | NCS1                         |
| PLPP4                 | SPON1                 | ARHGAP20                    | SLC4A8                        | CRADD                    | ANO4                     | GPC6                         |
| MYO16                 | CLMN                  | GABRG3                      | LIPC-AS1,<br>ALDH1A2,<br>LIPC | TNRC6A,<br>LINC01567     | VAT1L                    | SP6                          |
| CACNA1G               | PPIAP59               | TGM6                        | PARVB                         | RPS17P11 -<br>MFSD4BP1   | RPL3P11 -<br>ATP5PDP3    | CASC18                       |
| NDUFA12               | FANCD2OS,<br>FANCD2   | RN7SL782P<br>-<br>RN7SKP122 | IL19                          | NCKAP5 -<br>RN7SKP93     | CCDC85C                  | SDR9C7                       |
| NARS2                 | PKNOX2                | LMOD3 -<br>FRMD4B           | SLC25A6P5 -<br>LINC01505      | LINC02098 -<br>ETS1      | OSBPL6                   | RNU6-248P<br>- RNU6-<br>261P |
| HNF4G -<br>RNU2-54P   | LAMP1                 | RBFOX1                      | ARVCF                         | UBXN11                   | HYI, SZT2                | AHCYL1                       |
| RF00012 -<br>NMNAT1P2 | TGFB2                 | RNU4-77P -<br>KCNK1         | ITSN2                         | OTOF                     | MSH2                     | LINC01185                    |
| RAB1A -<br>RF00090    | SPRED2                | LINC01965                   | RN7SKP141<br>- SMC4P1         | COL4A4                   | RANP7 -<br>SALL4P5       | RPEP2 -<br>HMGB3P12          |
| C3orf67               | PTPRG                 | RN7SL271P<br>- UBE2Q2P9     | LINC02008                     | TFP1                     | RNU6-637P<br>- TERC      | SNRPCP13 -<br>ENPP7P11       |
| RNU6-412P<br>- RAC1P2 | BANK1 -<br>SLC39A8    | SETD7                       | SH3RF1                        | LINC02268                | RNU6-381P<br>- FGF10     | F2R - F2RL1                  |
| WDR41                 | MEF2C-AS1             | RPS17P2 -<br>LINC02214      | RF00019 -<br>ZCCHC10          | LARS                     | G3BP1                    | KDM1B                        |
| CDKAL1                | DST                   | COL12A1                     | LINC02532 -<br>CD24           | SGK1                     | SNX9                     | TULP4                        |
| PHF14                 | MTDHP1 -<br>ZNF117    | PQLC1P1 -<br>EEF1A1P28      | DLX5                          | LYPLA1P1 -<br>IQUB       | INSIG1                   | NKAIN3                       |
| SGK3                  | PPP1R42               | FZD6 -<br>CTHRC1            | PDCD1LG2                      | LINC01243 -<br>MTATP6P30 | ATP5MFP3 -<br>RFC5P1     | LINC00476                    |
| FOXE1 -<br>TRMO       | MTND3P4 -<br>ARL2BPP7 | PNPLA7                      | WAC                           | RPL34P19 -<br>RN7SL825P  | C10orf71                 | RNU6-478P<br>- MARK2P15      |
| MICAL2                | TRIM51CP              | AHNAK                       | CCDC89                        | AICDA                    | OVCH1-AS1                | RNU7-106P<br>- OTOGL         |

|                     |                    |                       |                      |                       |                    |                       |
|---------------------|--------------------|-----------------------|----------------------|-----------------------|--------------------|-----------------------|
| TPTE2P3             | RABEPKP1 - DACH1   | ARF4P4 - LINC00377    | FARP1                | LINC00343             | FAM181A            | LINC02304 - LINC02325 |
| HERC2               | TRPM1              | THSD4                 | AGBL1                | TMC5                  | SDR42E2            | CDH13                 |
| ALOX12-AS1          | COX10-AS1          | MPP3 - CD300LG        | DCAF7                | TCAM1P                | CDH19 - RNU6-1037P | ZNF813                |
| CST1 - CSTP2        | RPS2P1 - ASIP      | LINC01271 - RN7SL636P | SYNJ1                | TEX33 - TST           | RAB20              | PDS5B                 |
| SPSB1               | BDH1, BDH1         | ADARB2                | TOP1                 | LIN28B                | C2orf83            | TIAM2                 |
| RPL7P19 - ETF1      | GOLIM4             | RNF165                | SLC25A48             | COLGALT2              | ABCB11             | ARAP2                 |
| IRF2                | AKAP9              | DSCAML1               | IL34                 | LINC01838 - ZNF30-AS1 | SLC25A5P3 - VSTM2A | TRIQK                 |
| LINC01508           | RSPO4              | KAZN                  | CCDC134              | MS4A4E - MS4A4A       | PICALM - RNU6-560P | CLU - SCARA3          |
| ZNF292              | CDC42EP3           | UTS2B                 | PAK2                 | ADCY8                 | RNF219-AS1         | RORA-AS1              |
| SLC44A5             | NME9               | CCRL2                 | MMP3 - MMP12         | NFU1P1 - MYRIP        | NRXN3              | TLN2                  |
| BMPER               | SLC8A1-AS1         | SLC9A9                | EFR3A                | LINC02343             | SLC24A4            | ZFP3 - ZNF232         |
| CEACAM22 P          | RF00285 - BCL3     | MS4A4A - MS4A6E       | BCAM - NECTIN2       | TOMM40 - APOE         | APOC4              | APOC2                 |
| CLASRP              | GEMIN7-AS1         | PPP1R37               | INPP5D               | CD2AP - ADGRF2        | ADGRF2             | PILRA                 |
| AGFG2               | AP4M1              | CASTOR3               | PMS2P1               | EPHX2                 | GULOP              | PSMC3 - RAPSIN        |
| SPI1                | FERMT2             | BCKDK                 | ZNF232               | CNN2                  | CEACAM20           | APOC4                 |
| CLPTM1 - RELB       | GEMIN7             | MARK4, PPP1R37        | GEMIN7-AS1           | EXOC3L2, MARK4        | MARK4, EXOC3L2     | CSTF1 - CASS4         |
| HLA-DRB1 - HLA-DQA1 | GPR141, EPDR1      | CELF1                 | CLU                  | CR1; CR1              | MTCO3P30           | SLC2A9                |
| RNU1-80P - TNRC6C   | RIMBP2             | RNU6-276P - EXOC1L    | KRT18P16 - LINC01170 | SUCLG2                | GMNC - OSTN        | GLIS3                 |
| PFDN1 - HBEGF       | NFIC               | ZAP70                 | PUS1                 | MAP2K5                | ANGPT4             | ARIH1                 |
| LINC01098           | HIGD1AP3 - MSX2    | FAM83E                | RNU4ATAC8 P - LRR1Q3 | KCNN3                 | HSPA8P9 - CLDN18   | RN7SL691P             |
| IL21-AS1            | SERINC5 - KRT18P45 | CDC42SE2              | SH2D4B               | FRMD4A                | IRF6               | PMS2CL                |
| THSD7A - TMEM106B   | LINC02210-CRHR1    | ARL17B                | WNT3                 | HID1-AS1 - CDR2L      | MACROD2 - PPIAP17  | DAPL1                 |
| PDE1A               | CADM2              | FBXO40                | OFCC1                | PEX6                  | SORD               | LINC01684             |
| ABI3                | PLCG2              | RHBDF1                | ATP5F1C              | BSG                   | C11orf65, ATM      | TECTA                 |
| TREM2 - TREML2      | NDUFAF6            | AP2A2                 | IGHV2-70 - IGHV3-71  | TRIP4                 | ZCWPW1             | CASS4                 |



**Psychosis-related genes**

|            |            |            |            |            |
|------------|------------|------------|------------|------------|
| HTR2A      | DRD2       | HTR7       | GRB10      | SLAMF1     |
| NFKB1      | ACKR1      | AS1        | ZNF618     | COMT       |
| GRM7       | AGER       | SLITRK1    | ADGRL2     | GSAP       |
| TMEM26     | AQP8       | HS3ST3A1   | SCN8A      | RGS6       |
| FAM43A     | NRG3       | AC087071.1 | CAMKMT     | SLC3A1     |
| STX8       | ZNF473     | NSG1       | PLA2G4A    | DOCK1      |
| FAR2P1     | ST5        | HS3ST4     | COMT       | MKNK1      |
| KIT        | TBX1       | CNTN4      | LIPC       | AC079950.1 |
| CCDC60     | MSRA       | CEACAM21   | AC108734.4 | TCF4       |
| BCL9       | TMEM245    | COL25A1    | SGCD       | LINC00499  |
| ADCK1      | C3orf38    | CCDC122    | PHF20      | ENOX1      |
| PTPN6      | EFNA5      | DMAC1      | AC012254.2 | NFS1       |
| PLCB1      | COL26A1    | IQGAP2     | DLGAP2     | MECR       |
| CTNNA2     | STXBP5L    | TENM4      | EYS        | AC009468.1 |
| BMPR1B     | NRG2       | TCHP       | HS6ST1     | CEP41      |
| SLC14A2    | COLGALT2   | RGL1       | CSMD1      | NAV2       |
| RICTOR     | OSMR       | AC009652.2 | COL12A1    | KHDRBS2    |
| MPP4       | TEP1       | LINC01435  | NFATC2     | MEGF10     |
| SPATA6L    | PCDH7      | CNTNAP5    | TNIK       | SPATA6L    |
| NBEA       | RTN1       | RBFOX1     | FANCA      | RBKS       |
| ZNF385B    | GPM6A      | TENM3      | MIR583HG   | ATXN7L1    |
| FAM120A    | MAD1L1     | AC120114.1 | CWC22      | GRM3       |
| LINC01725  | CACNA1C    | KLF12      | AKAP6      | APOPT1     |
| AC104574.2 | MSI2       | ZEB2       | RMND5A     | FXR1       |
| SLC39A8    | BANK1      | GRIA1      | SLC17A3    | POM121L2   |
| ZSCAN31    | CARMIL1    | ABCB1      | IMMP2L     | AL161716.1 |
| GLIS3      | MRTFA      | AKT3       | FHIT       | AC244033.2 |
| SH3GL3     | ZSWIM6     | SHC4       | AL672167.1 | NTRK3      |
| RALGAPA1   | TMEM132D   | CIR1       | HCN1       | ADCY1      |
| NR3C2      | SPATS2L    | LPP        | GABBR2     | CNTN2      |
| ZFHX3      | AC092650.1 | DST        | ZDHHC2     | KLF6       |
| RPSAP52    | PLCL1      | EFR3B      | ERCC8      | XYLB       |
| GRID1      | DLG2       | DNAJC11    | CALN1      | NOL4       |
| MOSMO      | ZDHHC8     | RAB8B      | PIK3C2A    | SMG6       |
| ZNF536     | PRKD1      | AL022476.1 | EMX1       | AL163541.1 |
| GGNBP1     | MPHOSPH9   | SHISA6     | TENM2      | TBC1D29P   |
| PCLO       | ARHGAP40   | INHBA      | ZBTB7B     | ADGRV1     |

|            |            |            |            |             |
|------------|------------|------------|------------|-------------|
| NOS1       | DOP1B      | DNAH1      | CACNA1D    | LIMK2       |
| KIF1BP     | TBC1D5     | TMEM182    | CHRNA2     | SFMBT1      |
| MIR137HG   | BCL11B     | LILRP2     | AL591368.1 | EEFSEC      |
| MAIP1      | AC011306.1 | OPCML      | FRMD5      | FAM86B3P    |
| SCAPER     | KYAT1      | PTPRF      | PSORS1C1   | LIN28B      |
| NAB2       | ZNF664     | NLGN1      | SPG7       | AC114763.1  |
| AC008667.1 | MIRLET7BHG | ROBO2      | NTM        | AL583808.1  |
| NPAS3      | LHFPL3     | AC022784.1 | DGKI       | CDC25C      |
| CYP26B1    | QPCT       | CACNA1I    | SNAP91     | SDCCAG8     |
| ETF1       | RIT1       | AC091862.1 | BTN3A1     | AL662884.2  |
| TSNARE1    | STUM       | LINC02219  | EPN2       | MAN2A1      |
| LIMA1      | DOP1A      | SRR        | LINC02267  | DCC         |
| PLCH2      | FURIN      | LEMD2      | MAGI2      | ASAP1       |
| PTPRD      | APBA1      | ATP2A2     | FAM214A    | RUSC2       |
| OSBPL10    | TTC12      | KALRN      | TRPM6      | MTHFD1L     |
| OPRD1      | NRGN       | TSPAN2     | CNNM2      | ARHGEF26    |
| ALMS1      | AC021594.2 | PRRG2      | YPEL1      | GNG7        |
| ZBED4      | MMP16      | PCNX3      | TCF20      | AL035685.1  |
| PPP1R16B   | STK4       | CLIP1      | LRRTM4     | HIST1H2APS4 |
| PRKG1      | SORCS3     | CALB2      | RHBDL3     | ZNF804A     |
| FOXP1      | LINC02438  | CMAHP      | GUSBP2     | TEK         |
| SRPK2      | DNAJA3     | AP000688.2 | STAG1      | LINC00862   |
| SATB2      | ZFAND2B    | PPP1R13B   | NEU1       | TMTC1       |
| PCNX1      | LINC00606  | LINC01470  | SLCO6A1    | HFE         |
| MSR1       | EBLN3P     | CACNB2     | GLG1       | LINC01539   |
| ZCCHC14    | PHACTR3    | PTGIS      | KIF21B     | SCN9A       |
| ZNF823     | SP4        | SOX5       | GULOP      | CMAHP       |
| AL645941.2 | CUX1       | AC097634.4 | IGSF9B     | AC046136.1  |
| MIR29B2CHG | NEGR1      | TRAPPC3    | CAPN2      | LRRN2       |
| ZCCHC17    | VRK2       | AC096570.1 | SPHKAP     | BCL11A      |
| EPC2       | TMEM178B   | PPP2R3A    | FRMD4B     | KLHL29      |
| DPYD       | SLC9B2     | SHISA9     | AC008415.1 | PTPRK       |
| GRAMD1B    | SNORC      | POU6F2     | FMN2       | TTYH3       |
| CHD2       | AC090578.1 | LINC01122  | CPEB1      | ANKRD23     |
| FER        | ALOX15P2   | CACNB2     | SKAP1      | RTKN2       |
| AL445623.2 | MINDY2     | DGKZ       | TMCO5B     | AC067752.1  |
| CHRNA3     | NFATC3     | RPTOR      | SPECC1     | GID4        |
| AP005203.1 | PCBP3      | THOC7      | PSD3       | THRB        |
| ZDHHC20    | PCDH9      | FOXO3      | AIG1       | SYNGAP1     |

|            |            |            |            |            |
|------------|------------|------------|------------|------------|
| ADAMTSL3   | HS6ST3     | GPC6       | ANKRD36    | SNAPC3     |
| SUFU       | HECW2      | AL391117.1 | ATP2B2     | PLCL2      |
| ELAC2      | YWHAE      | GRIN2A     | U91319.1   | HCP5       |
| ITPR3      | JAM3       | AP002851.1 | AL138974.1 | FOXO6      |
| CENPM      | PEPD       | BNIP3L     | PAK2       | CLCN3      |
| AC117377.1 | POC1B      | TACC2      | LINC02551  | LRP4       |
| C12orf76   | AC016866.1 | NT5C2      | LINC01360  | AC009226.1 |
| RN7SL100P  | PCDH15     | BICC1      | AC024901.1 | AC005906.2 |
| AC002070.1 | GPM6A      | AL162726.3 | KIAA0391   | AL121694.1 |
| AL358790.1 | AP003174.1 | MARK2      | LETM2      | AGO4       |
| CRB1       | NEURL1     | CFAP58     | MTUS2      | ACTG1P22   |
| CUL3       | MGLL       | GALNT10    | LINC00301  | GRIN2B     |
| IQANK1     | RALGPS1    | GALNT2     | DMTF1      | EBNA1BP2   |
| PDE4B      | LINC01776  | ELAVL4     | AL138927.1 | SLC45A1    |
| LINC02549  | CCDC192    | AP003049.2 | LINC01583  | AC087564.1 |
| CIB4       | SLC1A1     | AL390957.1 | LINC01310  | DNAJB5     |
| SPOCK1     | PIGO       | LINC00303  | AC116337.3 | ZP1        |
| AC093766.1 | CNTNAP4    | ZNF665     | DKK3       | RELN       |
| AGBL1      | ACSM1      | TRAF3      | PIK3C2G    | HHAT       |
| ZFYVE28    | LINC01255  | RORA       | KIF26B     | NLRC5      |
| ARNTL      | CDH13      | FARSB      | SGK1       | RENBP      |
| TBXAS1     | SGCZ       | AGAP1      | FEZ1       | ANK3       |
| PLAA       | ACSM3      | NOTCH4     | BRD1       | FBXO11     |
| ARHGAP31   | NKAIN2     | PRRC2A     | SNX29      | AC027458.1 |
| ANO4       | AC026167.1 | VIPAS39    | B9D1       | ZFAND6     |
| PDE5A      | SLC47A2    | RASGRF2    | EVL        | PRMT8      |
| PTPN13     | TCERG1L    | CACNA1S    | AC060809.1 | LINC01505  |
| SAMD4A     | PLD1       | SIGLEC15   | CHCHD6     | PHACTR2    |
| CR1        | AC005871.2 | RNF135     | POMT2      | CTNNA3     |
| PIM3       | EGFEM1P    | USP24      | SLC5A10    | AL117329.1 |
| POLN       | AF127577.4 | AC104041.1 | AC092957.1 | AC091078.1 |
| ZBBX       | ADGRE3     | OXR1       | EIF3F      | CWH43      |
| AC007179.2 | NRP1       | MIR100HG   | TUSC3      | XKR6       |
| CACNA1B    | AL512506.3 | OSCP1      | PRKN       | NSMCE2     |
| AFF3       | AC091114.1 | PTPRT      | DPP10      | FAP        |
| AC018767.3 | AC011369.1 | CR1L       | LINC02223  | HIBCH      |
| FSTL5      | VPS45      | MIR4432HG  | ZNF362     | TDRP       |
| PECR       | AMBP       | ARHGEF28   | CALD1      | AC008892.1 |
| CA12       | NXN        | GVQW3      | PRLR       | SLC17A6    |

|            |            |            |            |            |
|------------|------------|------------|------------|------------|
| TOX        | ZNF611     | SERPINA1   | AC114689.3 | C1orf167   |
| ARL3       | AC040169.4 | AC069234.1 | GTF2IP7    | EYPD1      |
| SIPA1L2    | SPAG16     | COL21A1    | RASGEF1B   | Z82202.2   |
| AC078923.1 | LINC01320  | PPP3R1     | RASSF1     | LINC02232  |
| FYN        | YWHAG      | KIAA1217   | CLSTN3     | HIP1R      |
| AF123462.1 | RYR3       | AC006305.1 | RERE       | TRANK1     |
| PBRM1      | TNXB       | UBE2Q2P1   | AC022031.2 | ITIH3      |
| HYKK       | CARMIL1    | HIST1H1PS1 | NT5C2      | MDK        |
| AMBRA1     | IMMP2L     | MEF2C      | FAM86B3P   | SFXN5      |
| STK19      | KDM4C      | ZNF365     | OR5V1      | ZKSCAN4    |
| TRIM27     | AL662860.1 | TRIM26     | COX11P1    | ZBED9      |
| SFTA2      | AL121936.2 | HCP5       | FLOT1      | AL138726.1 |
| SLC17A4    | NSUN6      | SLC7A6     | AC092167.1 | ADAM10     |
| SLC9B1     | PPP2R2B    | FAM184A    | PRDM14     | ZFPM2      |
| FES        | TAOK2      | AC012322.1 | MAU2       | ARHGEF10L  |
| CABLES1    | IPO8       | LMO7       | LTN1       | PCDH12     |
| PLCB4      | RPN2       | STX2       | ZNF740     | C11orf21   |
| CCDC102B   | GIGYF1     | TMPRSS5    | KSR2       | UXS1       |
| ACTL7A     | ATP6V1E2   | PHF2P2     | LSM1       | EDIL3      |
| LRP1B      | AC008474.1 | NKAPL      | TSPAN18    | MPC2       |
| LSM1       | ITIH1      | SPTLC1     | MSRA       | COMMD10    |
| LINC00243  | AC069228.1 | AL138889.2 | LINC01478  | GABBR1     |
| AC091096.1 | TCF7L2     | AGBL4      | PSORS1C1   | AL139300.2 |
| DOCK4      | TTLL6      | ST3GAL1    | ADAMTS16   | ZZEF1      |
| LINC01592  | AC000403.1 | RFESD      | SNED1      | ZNF93      |
| FTCDNL1    | GIGYF2     | LINC00637  | TMEM219    | R3HDM2     |
| SCAF1      | AC104162.2 | NLGN4X     | NDRG4      | NSD3       |
| GSDME      | RAI1       | PLA2G15    | SLC4A10    | FAM178B    |
| FAM177A1   | LINC00461  | AC007570.1 | ZKSCAN3    | OR5V1      |
| DDR1       | NGEF       | AL662884.1 | HIST1H2BN  | ZSCAN9     |
| MAD1L1     | MUCL3      | MIR137HG   | CNOT1      | F2         |
| BTN2A2     | FGFR1      | CYP2D7     | TWF2       | RFT1       |
| MTCO3P1    | PBX2       | LINC00240  | CHRNA5     | BTN3A2     |
| OR11A1     | KDM3B      | BTN2A1     | TRIM10     | MUC22      |
| C2         | PBX2       | HCG20      | EHMT2      | ATAT1      |
| SFTA2      | AL645929.2 | STT3A      | PLCB2      | PTPRG      |
| ITIH4      | LINC02033  | C12orf65   | THOC7      | AL807742.1 |
| PRPF3      | KIF5C      | AL392086.1 | AC007221.2 | CLEC17A    |
| PALB2      | MPP6       | GLT8D1     | AC010538.1 | ANKS1B     |

|            |            |        |       |         |
|------------|------------|--------|-------|---------|
| SLC35F2    | SYNE1      | HDAC4  | ZNRD1 | ZNF615  |
| AC090993.1 | SEMA3A     | MRM2   | GRIK1 | ZMIZ1   |
| AP001267.5 | AC104009.1 | NOTCH4 | DRD3  | CACNA1C |

### Vitamin D-perturbed genes

|           |           |         |         |          |
|-----------|-----------|---------|---------|----------|
| VDR       | CYP27B1   | CYP27A1 | CYP2R1  | CYP24A1  |
| CD14      | ATF3      | THBD    | SPP1    | SERPINA3 |
| FOS       | GEM       | EFTUD1  | IL8     | G0S2     |
| TREM1     | FN1       | CLMN    | THBS1   | MAPK13   |
| LCN2      | EDNRA     | CXCL1   | FBP1    | EGR1     |
| CYP26B1   | SHE       | IFIT1   | STAC3   | VCAN     |
| DPP4      | CYP51A1   | A2M     | CAMP    | HBEGF    |
| EDN1      | S100A8    | OSR2    | SULT1C2 | SLC22A3  |
| GCLC      | C15orf48  | HOPX    | TGFB2   | CYP19A1  |
| GPNMB     | DDX27     | INMT    | TIMP3   | CD36     |
| KCNK3     | NREP      | PDK4    | IBSP    | FGF9     |
| MYC       | CCL2      | DLX5    | SEMA6B  | SEMA3C   |
| HAVCR1    | ALOX15    | S100A4  | GZMB    | TGM2     |
| HSD11B1   | BTG2      | CTSH    | CYP1A1  | CILP     |
| BHLHE40   | CCND2     | AFP     | IGFBP1  | PPP2CA   |
| CRISPLD2  | TNC       | ZFP36   | NME1    | CCL22    |
| FABP4     | CYP3A4    | SCD     | ORM1    | VNN1     |
| CA2       | RGN       | COL3A1  | DUSP5   | MED1     |
| TNFRSF11B | C20orf197 | HMGCS1  | PVALB   | NR0B2    |
| PHLDA1    | BCAT1     | MMP12   | C3      | ROCK2    |

### Antipsychotics-perturbed genes

|        |         |         |         |        |
|--------|---------|---------|---------|--------|
| DRD2   | ACE     | CACNA1G | HRH1    | ADRA1A |
| ADRA1B | HTR2A   | HTR2B   | DRD4    | HTR1A  |
| ADRA1D | SLC6A2  | HTR3A   | DRD1    | HTR2C  |
| OPRD1  | SLC6A4  | SLC18A2 | CHRM2   | CHRM3  |
| CHRM5  | DRD3    | HTR7    | ADRB1   | CHRM4  |
| CHRM1  | HTR1D   | HRH4    | CALY    | EGR1   |
| FOS    | ATF3    | CYP1A1  | CYP51A1 | CDK1   |
| HMGCS1 | CTGF    | SULT1A1 | MEIS2   | CCNA2  |
| ALB    | ONECUT1 | HERPUD1 | GDF15   | CA3    |
| RRM2   | STAC3   | DDX27   | EGR2    | PHLDA1 |
| CYP2E1 | CCNB2   | DBP     | PPP2CA  | HAMP   |

|        |         |         |         |        |
|--------|---------|---------|---------|--------|
| MKI67  | RGN     | BHLHE40 | NREP    | PLAU   |
| SCD    | FAM111A | HMOX1   | SLC22A8 | JUN    |
| GJB1   | CDKN1A  | ALDH1A1 | GZMB    | DDIT4  |
| CSDC2  | TAGLN   | CXCL1   | IFIT1   | RSAD2  |
| CHAC1  | SOX11   | ZNF354A | FGF9    | IGFBP5 |
| CTH    | FABP1   | INSIG1  | HSPA1B  | LTN1   |
| EDNRA  | CCL2    | LOC1720 | CYP1B1  | ENPP2  |
| KLF4   | NR4A3   | LOX     | SPP1    | NR1D2  |
| PPP3CA | CEP104  | LDLR    | HOMER1  | IDI1   |

- 1 Okada, Y. *et al.* Meta-analysis identifies multiple loci associated with kidney function–related traits in east Asian populations. *Nat. Genet.* **44**, 904 (2012).
- 2 Hu, Y. *et al.* GWAS of 89,283 individuals identifies genetic variants associated with self-reporting of being a morning person. *Nature communications* **7**, 10448 (2016).
- 3 Shi, Y. *et al.* A genome-wide association study identifies new susceptibility loci for non-cardia gastric cancer at 3q13. 31 and 5p13. 1. *Nat. Genet.* **43**, 1215 (2011).
- 4 Yatagai, Y. *et al.* D91 REMODELING OF THE BRONCHOVASCULAR UNIT AND LUNG DISEASE: Genome-Wide Association Study For Late-Onset Asthma Demonstrates Possible Association With A Gene Related To Diffuse Panbronchiolitis. *Am. J. Respir. Crit. Care Med.* **191**, 1 (2015).
